# Supplementary material for: Signals for stress erythropoiesis are integrated via an erythropoietin receptor-phosphotyrosine-343-Stat5 axis
Source: JCI journal article supplement (doi:10.1172/jci25227), 2006-03-01
Supplement: sd1 [file 1]

## METHODS SUPPLEMENT

### PCR primer pairs:

*Epo*, 5'-AGAATGGAGGTGGAAGAACAGG-3' and 5'-CTGGTGGCTGGGAGGAATTG-3';  
*Pim-1*, 5'-TTCTGGACTGGTTCGAGAGG-3' and 5'-GCTCCTCGTTCGGTGATAAA-3';  
*Onco-M*, 5'-AACTGAGCAAGCCTCACTTCC-3' and 5'-ATGCCGAGGATATTGTGCCG-3';  
*Bcl-x*, 5'-ACTGTGCGTGGAAGCGTAGA-3' and 5'-TGCTGCATTGTTCCCGTAGAG-3';  
*SOCS3*, 5'-CCGCTTCGACTGTGTACTCAAG-3' and 5'-TCTTCTCGCCCCAGAATAGAT-3';  
*Gas-6*, 5'-GCCATCCAGCAGACAGTCAAG-3' and 5'-TGGTTTCCGTGCCGACATC-3';  
*Pim-2*, 5'-CCAGAACCTCTGGTCCCTAA-3' and 5'-CTAAAGAGCTGCTGGGGATG-3';  
*Onco-MRβ*, 5'-CCAGCCCTCAGCACAAACC-3' and 5'-AGGACCATCAAGGACTCAGGAG-3';  
*Actin*, 5'-CGTGCGTGACATTAAAGAGAAG-3' and 5'-TGGATGCCACAGGATTCCATA-3';  
*Cis-1*, 5'-CCA-CTG-GCT-TTG-TCA-AGA-AGG-3' and 5'-AGG-CCA-CAT-AGT-GCT-GCA-CAA-3'.

**Primary Antibodies** – antibodies used were from Cell Signaling Technology (CS), Abcam Ltd. (AC), or Upstate Cell signaling Solutions (UPS) as designated: Pim-1, CS # 4722; phospho-Stat5, CS #9351; phospho-Stat3, CS #9131; phospho-Stat1, CS #9171, Stat-5, CS #9352; Stat-3, CS #9132; Stat-1, CS #9172; phospho-ERK, CS #9101; ERK, CS #9102; Jak2, UPS #06-255; phospho-Jak2, UPS #07-123; GAPDH, AC #ab9485.

(A)

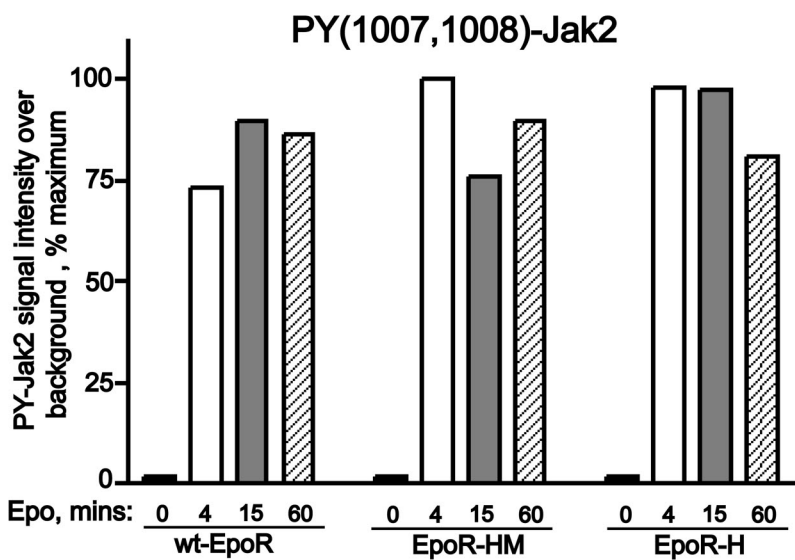

(B)

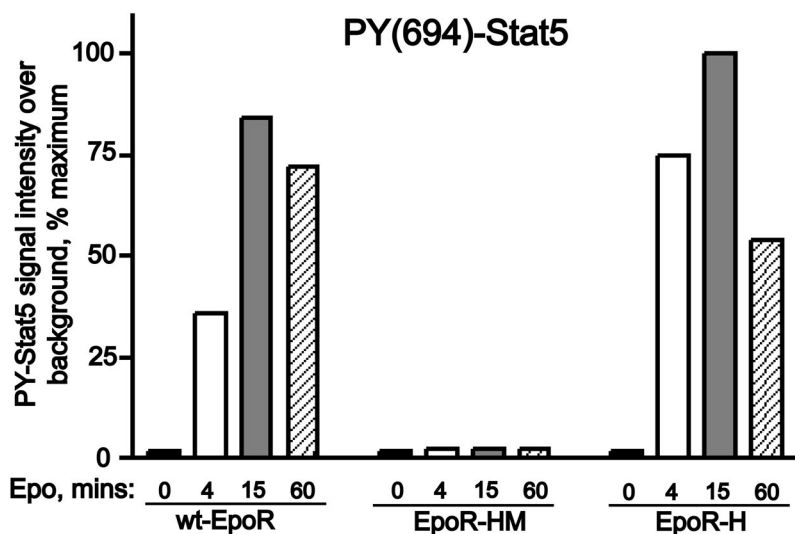

(C)

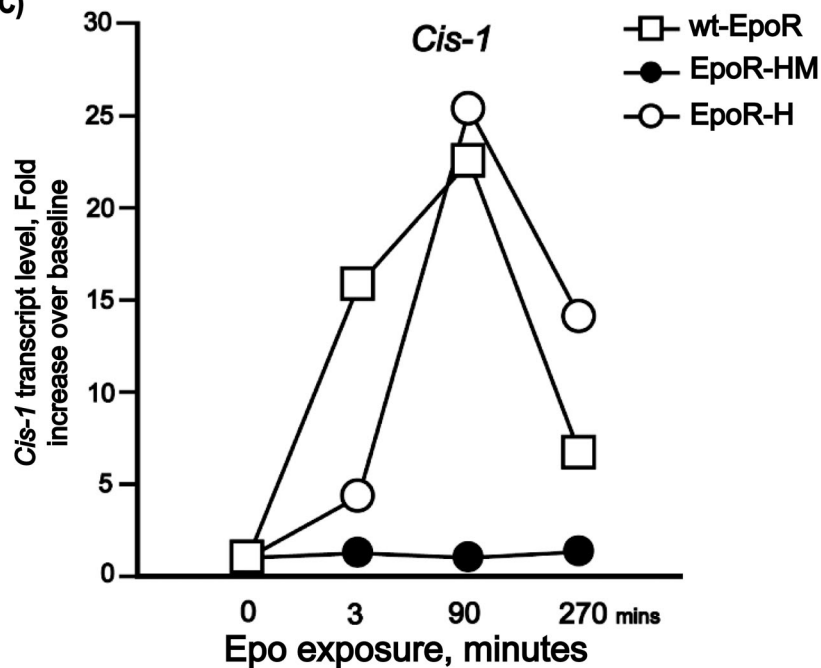

## SUPPLEMENTAL FIGURE LEGEND

**Figure S-1. Jak2 and Stat5 activation profiles for wt-EpoR-, EpoR-H and EpoR-HM erythroblasts.** **A]** Jak2 is activated with comparable kinetics via wt-EpoR, EpoR-H and EpoR-HM alleles: Kit<sup>pos</sup>CD71<sup>high</sup> erythroblasts were isolated from expanded bone marrow preparations. Cytokines then were withdrawn for six hours, and erythroblasts were exposed to Epo at 2.5U/mL. At the indicated intervals, phospho-Jak2 levels then were determined by western blotting, and quantitative imaging (with standardization for GAPDH). **B]** Stat5 activation via wt-EpoR and EpoR-H, but not EpoR-HM alleles: In the above samples, levels of phospho-Stat5 also were quantitatively analyzed. Note the essential failure of EpoR-HM to detectably stimulate Stat5. **C]** Kit<sup>pos</sup>CD71<sup>high</sup> erythroblasts were isolated from expanded wt-EpoR, EpoR-HM and EpoR-H marrow preparations, and cultured for six hours in 0.5% BSA, 10ng/mL insulin, 0.1mM 2-ME, IMDM. At 0, 30, 90 and 270 minutes of subsequent Epo-exposure (1U/mL), cells were lysed in Trizol reagent. Quantitative RT-PCR then was used to determine Epo-induced levels of *Cis-1*. *Actin* was used as a normalizing control.
